# Supplementary material
Source: MDPI journal article supplement (https://www.mdpi.com/1999-4907/12/11/1511)
Supplement: s1 [file s1]

**Table S1.** Location information of the 171 sampled *C. camphora* individuals.

| Site name          | Population code | Genet IDs | Longitude(E)  | Latitude(N)   | Altitude(m) | DBH (cm) | Comments                                                   |
|--------------------|-----------------|-----------|---------------|---------------|-------------|----------|------------------------------------------------------------|
| Luzhou, Sichuan    | SCLZ            | 1         | 105°26' 56.3" | 28°58' 16.8"  | 311.2       | 59       | Tree at campus of Luzhou Medical College, planted at 1930s |
| Luzhou, Sichuan    | SCLZ            | 2         | 105°26' 44.2" | 28°58' 11.1"  | 303.4       | 66       | Tree at campus of Luzhou Medical College, planted at 1930s |
| Luzhou, Sichuan    | SCLZ            | 3         | 105°26' 54.3" | 28°58' 13.4"  | 322.3       | 60       | Tree at campus of Luzhou Medical College, planted at 1930s |
| Luzhou, Sichuan    | SCLZ            | 4         | 105°26' 45.1" | 28°58' 15.4"  | 319.8       | 50       | Tree at campus of Luzhou Medical College, planted at 1930s |
| Luzhou, Sichuan    | SCLZ            | 5         | 105°26' 64.2" | 28°58' 13.3"  | 299.7       | 70       | Tree at campus of Luzhou Medical College, planted at 1930s |
| Yibin, Sichuan     | SCYB            | 6         | 104°36' 36.8" | 28°40' 46.4"  | 364.2       | 66       | Tree at mountainous roadside                               |
| Yibin, Sichuan     | SCYB            | 7         | 104°25' 50.6" | 28°25' 69.7"  | 522.9       | 55       | Tree at mountainous area                                   |
| Yibin, Sichuan     | SCYB            | 8         | 104°25' 47.8" | 28°25' 54.4"  | 513.3       | 76       | Tree at mountainous area                                   |
| Yibin, Sichuan     | SCYB            | 9         | 104°25' 55.9" | 28°25' 47.8"  | 540.7       | 70       | Tree at mountainous area                                   |
| Yibin, Sichuan     | SCYB            | 10        | 104°25' 63.2" | 28°25' 64.3"  | 552.1       | 81       | Tree at mountainous area                                   |
| Dazu, Chongqing    | CQDZ            | 11        | 105°51' 29.1" | 29°33' 35.6"  | 478.3       | 40       | Tree at Baiyun temple                                      |
| Dazu, Chongqing    | CQDZ            | 12        | 105°51' 35.5" | 29°33' 55.7"  | 460         | 48       | Tree at Baiyun temple                                      |
| Dazu, Chongqing    | CQDZ            | 13        | 105°51' 39.6" | 29°33' 75.3"  | 478.5       | 39       | Tree at Baiyun temple                                      |
| Dazu, Chongqing    | CQDZ            | 14        | 105°51' 48.4" | 29°33' 15.96" | 456.3       | 37       | Tree at Baiyun temple                                      |
| Youyang, Chongqing | CQYY            | 15        | 108°51' 16.8" | 28°43' 03.5"  | 1312.1      | 118      | Big tree at a farm village                                 |
| Youyang, Chongqing | CQYY            | 16        | 108°51' 31.5" | 28°42' 46.9"  | 1290.3      | 100      | Big tree at a farm village                                 |
| Youyang, Chongqing | CQYY            | 17        | 108°51' 22.1" | 28°42' 37.2"  | 1263.3      | 114      | Big tree at a farm village                                 |
| Daozhen, Guizhou   | GZDZ            | 18        | 107°43' 32.5" | 28°45' 70.1"  | 782.1       | 37       | Tree at mountainous area                                   |
| Daozhen, Guizhou   | GZDZ            | 19        | 107°43' 32.8" | 28°68' 48.1"  | 814.3       | 50       | Tree at mountainous area                                   |
| Daozhen, Guizhou   | GZDZ            | 20        | 107°34' 60.5" | 28°49' 62.3"  | 682.6       | 53       | Tree at mountainous area                                   |
| Tongren, Guizhou   | GZTR            | 21        | 109°11' 22.6" | 27°43' 03.3"  | 303.4       | 91       | Tree at Dongshan temple                                    |
| Tongren, Guizhou   | GZTR            | 22        | 109°15' 41.5" | 27°34' 42.2"  | 531.3       | 210      | Big tree at a farm village                                 |
| Tongren, Guizhou   | GZTR            | 23        | 109°11' 66.6" | 27°44' 33.1"  | 249.8       | 126      | Big tree at a old garden                                   |
| Tongren, Guizhou   | GZTR            | 24        | 109°15' 41.3" | 27°34' 44.5"  | 546         | 187      | Big tree at a farm village                                 |

|                   |      |    |               |              |       |     |                                       |
|-------------------|------|----|---------------|--------------|-------|-----|---------------------------------------|
| Yichang, Hubei    | HBYC | 25 | 111°27' 67.7" | 30°39' 18.2" | 167.6 | 74  | Tree at Three Gorges Botanical Garden |
| Yichang, Hubei    | HBYC | 26 | 111°17' 10.8" | 30°42' 17.0" | 76.8  | 54  | Tree at Children Garden               |
| Yichang, Hubei    | HBYC | 27 | 111°17' 64.8" | 30°42' 30.2" | 103.4 | 81  | Tree at Dongping Garden               |
| Yichang, Hubei    | HBYC | 28 | 111°17' 73.1" | 30°42' 26.5" | 108.4 | 67  | Tree at Dongping Garden               |
| Yichang, Hubei    | HBYC | 29 | 111°17' 75.5" | 30°42' 05.7" | 131.5 | 51  | Tree at a roadside urban area         |
| Huaihua, Hunan    | HNHH | 30 | 110°10' 97.3" | 28°00' 54.1" | 178.3 | 70  | Tree at a urban area                  |
| Huaihua, Hunan    | HNHH | 31 | 110°14' 69.7" | 28°08' 11.6" | 233.1 | 43  | Tree in front of hoggerly             |
| Huaihua, Hunan    | HNHH | 32 | 110°11' 02.3" | 28°00' 58.1" | 199.5 | 48  | Roadside tree at a garden             |
| Huaihua, Hunan    | HNHH | 33 | 110°10' 99.1" | 28°00' 54.0" | 154.6 | 61  | Roadside tree at a garden             |
| Huaihua, Hunan    | HNHH | 34 | 110°11' 02.2" | 28°00' 47.5" | 167.3 | 52  | Roadside tree at a urban area         |
| Shuangfeng, Hunan | HNSF | 35 | 112°11' 19.9" | 27°27' 74.0" | 90.9  | 53  | Roadside tree at a garden             |
| Shuangfeng, Hunan | HNSF | 36 | 112°11' 11.8" | 27°27' 71.8" | 115.7 | 80  | Tree at a suburban elementary school  |
| Shuangfeng, Hunan | HNSF | 37 | 112°11' 10.5" | 27°27' 79.1" | 100.5 | 102 | Big tree at a farm village            |
| Shuangfeng, Hunan | HNSF | 38 | 112°27' 21.8" | 27°24' 71.6" | 116.3 | 143 | Big tree at a farm village            |
| Shuangfeng, Hunan | HNSF | 39 | 112°27' 24.6" | 27°24' 78.3" | 147.9 | 124 | Big tree at a farm village            |
| Chibi, Hubei      | HBCB | 40 | 113°49' 27.5" | 29°47' 13.7" | 33.4  | 113 | Big tree at a suburban area           |
| Chibi, Hubei      | HBCB | 41 | 113°47' 93.3" | 29°45' 07.9" | 33.5  | 51  | Tree at a suburban area               |
| Chibi, Hubei      | HBCB | 42 | 113°53' 61.9" | 29°43' 56.1" | 22.3  | 62  | Tree at a Renmin Square               |
| Chibi, Hubei      | HBCB | 43 | 113°51' 24.1" | 29°42' 63.3" | 70.2  | 64  | Tree at a roadside urban area         |
| Hong'an, Hubei    | HBHA | 44 | 114°38' 50.8" | 31°29' 92.8" | 355.6 | 42  | Tree at mountainous area              |
| Hong'an, Hubei    | HBHA | 45 | 114°38' 43.2" | 31°29' 81.4" | 270.2 | 50  | Tree at mountainous area              |
| Hong'an, Hubei    | HBHA | 46 | 114°38' 42.2" | 31°29' 75.1" | 317.5 | 45  | Tree at mountainous area              |
| Hong'an, Hubei    | HBHA | 47 | 114°42' 79.4" | 31°20' 21.9" | 247.7 | 45  | Tree at mountainous area              |
| Hong'an, Hubei    | HBHA | 48 | 114°42' 80.3" | 31°20' 22.4" | 217.7 | 45  | Tree at mountainous area              |
| An'qing, Anhui    | AHAQ | 49 | 117°01' 16.5" | 30°31' 04.2" | 36.2  | 105 | Big tree at campus of middle school   |
| An'qing, Anhui    | AHAQ | 50 | 117°01' 14.7" | 30°31' 05.0" | 39.2  | 165 | Big tree at campus of middle school   |
| An'qing, Anhui    | AHAQ | 51 | 117°01' 04.6" | 30°31' 08.7" | 52.1  | 147 | Big tree at campus of middle school   |
| An'qing, Anhui    | AHAQ | 52 | 117°00' 89.5" | 30°30' 78.9" | 26.5  | 150 | Big tree at campus of middle school   |

|                   |      |    |               |               |       |     |                                                        |
|-------------------|------|----|---------------|---------------|-------|-----|--------------------------------------------------------|
| An'qing, Anhui    | AHAQ | 53 | 117°00' 98.4" | 30°30' 80.3"  | 30.1  | 148 | Big tree at campus of middle school                    |
| Chenzhou, Hunan   | HNCZ | 54 | 112°59' 35.3" | 25°47' 10.8"  | 160.8 | 32  | Roadside tree at a garden                              |
| Chenzhou, Hunan   | HNCZ | 55 | 112°59' 33.9" | 25°47' 16.5"  | 181.8 | 41  | Roadside tree at a garden                              |
| Chenzhou, Hunan   | HNCZ | 56 | 112°59' 38.8" | 25°47' 28.8"  | 178.3 | 59  | Roadside tree at a garden                              |
| Chenzhou, Hunan   | HNCZ | 57 | 112°59' 45.1" | 25°47' 28.1"  | 183.3 | 39  | Roadside tree at a garden                              |
| Changsha, Hunan   | HNCS | 58 | 113°04' 29.0" | 28°12' 19.5"  | 38.9  | 61  | Tree adjacent to a private house at a farm village     |
| Changsha, Hunan   | HNCS | 59 | 113°04' 09.3" | 28°12' 26.6"  | 52.1  | 42  | Tree adjacent to a private house at a farm village     |
| Changsha, Hunan   | HNCS | 60 | 112°56' 56.9" | 28°12' 34.8"  | 102.1 | 48  | Tree at rural area                                     |
| Changsha, Hunan   | HNCS | 61 | 112°59' 51.6" | 28°12' 60.1"  | 33.7  | 75  | Tree at a garden                                       |
| Changsha, Hunan   | HNCS | 62 | 112°59' 42.1" | 28°12' 68.2"  | 35.4  | 86  | Tree at a garden                                       |
| Yongxiu, Jiangxi  | JXYX | 63 | 115°35' 50.7" | 29°02' 92.9"  | 99.6  | 130 | Big tree adjacent to a private house at a farm village |
| Yongxiu, Jiangxi  | JXYX | 64 | 115°35' 50.3" | 29°02' 92.8"  | 99.1  | 166 | Big tree adjacent to a private house at a farm village |
| Yongxiu, Jiangxi  | JXYX | 65 | 115°33' 98.2" | 29°03' 68.7"  | 119.7 | 176 | Big tree at yard of temple                             |
| An'yi, Jiangxi    | JXAY | 66 | 115°37' 95.4" | 28°48' 66.9"  | 44.4  | 176 | Big tree at a farm village                             |
| An'yi, Jiangxi    | JXAY | 67 | 115°37' 95.1" | 28°48' 66.2"  | 43.8  | 124 | Big tree at a farm village                             |
| An'yi, Jiangxi    | JXAY | 68 | 115°37' 89.8" | 28°48' 65.7"  | 65.2  | 109 | Big tree at a rural elementary school                  |
| An'yi, Jiangxi    | JXAY | 69 | 115°37' 90.3" | 28°48' 65.8"  | 68.7  | 101 | Big tree at a rural elementary school                  |
| Hukou, Jiangxi    | JXHK | 70 | 116°12' 79.2" | 29° 43' 96.0" | 190.1 | 77  | Roadside tree at a oil refinery                        |
| Hukou, Jiangxi    | JXHK | 71 | 116°13' 86.0" | 29°43' 99.3"  | 21.3  | 111 | Big tree at a government compound                      |
| Hukou, Jiangxi    | JXHK | 72 | 116°13' 87.1" | 29°43' 98.8"  | 21.2  | 51  | Tree at a urban area                                   |
| Hukou, Jiangxi    | JXHK | 73 | 116°13' 86.9" | 29°43' 99.1"  | 20.9  | 100 | Big tree at a government compound                      |
| Wuyuan, Jiangxi   | JXWY | 74 | 117°45' 58.4" | 29°05' 12.6"  | 71.8  | 222 | Giant tree at a farm village                           |
| Wuyuan, Jiangxi   | JXWY | 75 | 118°01' 52.9" | 29°23' 60.2"  | 165.8 | 201 | Giant tree at a farm village                           |
| Wuyuan, Jiangxi   | JXWY | 76 | 117°28' 41.5" | 29°16' 50.1"  | 130.1 | 207 | Giant tree at a rural area                             |
| Wuyuan, Jiangxi   | JXWY | 77 | 117°27' 80.2" | 29°15' 98.5"  | 101.2 | 110 | Big tree at a rural area                               |
| Ruichang, Jiangxi | JXRC | 78 | 115°36' 51.2" | 29°43' 56.2"  | 39.4  | 125 | Big tree at a farm village                             |
| Ruichang, Jiangxi | JXRC | 79 | 115°36' 51.4" | 29°43' 55.7"  | 39.6  | 83  | Tree at a farm village                                 |
| Ruichang, Jiangxi | JXRC | 80 | 115°36' 49.7" | 29°43' 58.4"  | 23.7  | 127 | Big tree at a farm village                             |

|                       |      |     |                   |                   |       |     |                                                                              |
|-----------------------|------|-----|-------------------|-------------------|-------|-----|------------------------------------------------------------------------------|
| Pingxiang,<br>Jiangxi | JXPX | 81  | 114°04'<br>00.3'' | 27°38'<br>10.9''  | 166.6 | 217 | Giant tree at a farm village                                                 |
| Pingxiang,<br>Jiangxi | JXPX | 82  | 114°04'<br>11.0'' | 27°38'<br>00.7''  | 166.4 | 175 | Giant tree at a farm village                                                 |
| Pingxiang,<br>Jiangxi | JXPX | 83  | 114°04'<br>11.3'' | 27°38'<br>00.9''  | 165.9 | 260 | Giant tree at a farm village                                                 |
| Pingxiang,<br>Jiangxi | JXPX | 84  | 114°04'<br>21.1'' | 27°37'<br>59.5''  | 194.1 | 230 | Big tree at a suburban area                                                  |
| Le'an, Jiangxi        | JXLA | 85  | 115°42'<br>10.8'' | 27°20'<br>77.5''  | 175.7 | 106 | At the Le 'an Niutian ancient camphor forest, more than 3,000 big trees grow |
| Le'an, Jiangxi        | JXLA | 86  | 115°43'<br>84.9'' | 27°17'<br>85.6''  | 107.4 | 149 | At the Le 'an Niutian ancient camphor forest, more than 3,000 big trees grow |
| Le'an, Jiangxi        | JXLA | 87  | 115°43'<br>83.1'' | 27°17'<br>82.9''  | 102.9 | 146 | At the Le 'an Niutian ancient camphor forest, more than 3,000 big trees grow |
| Le'an, Jiangxi        | JXLA | 88  | 115°43'<br>80.0'' | 27°17'<br>81.2''  | 97.1  | 126 | At the Le 'an Niutian ancient camphor forest, more than 3,000 big trees grow |
| Le'an, Jiangxi        | JXLA | 89  | 115°43'<br>75.5'' | 27°71'<br>52.2''  | 101.7 | 133 | At the Le 'an Niutian ancient camphor forest, more than 3,000 big trees grow |
| Zixi, Jiangxi         | JXZX | 90  | 116°95'<br>33.1'' | 27°59'<br>86.5''  | 335.6 | 123 | Big tree at a farm village                                                   |
| Zixi, Jiangxi         | JXZX | 91  | 116°95'<br>43.1'' | 27°59'<br>63.3''  | 332.8 | 156 | Big tree at a farm village                                                   |
| Zixi, Jiangxi         | JXZX | 92  | 116°95'<br>54.1'' | 27°59'<br>73.4''  | 334.6 | 130 | Big tree at a farm village                                                   |
| Zixi, Jiangxi         | JXZX | 93  | 116°95'<br>49.1'' | 27°59'<br>76.5''  | 335.1 | 128 | Big tree at a farm village                                                   |
| Quannan,<br>Jiangxi   | JXQN | 94  | 114°35'<br>37.5'' | 24° 46'<br>36.1'' | 257.7 | 115 | Big tree at a farm village                                                   |
| Quannan,<br>Jiangxi   | JXQN | 95  | 114°22'<br>28.6'' | 24° 38'<br>65.0'' | 353.1 | 165 | Big tree at a farm village                                                   |
| Quannan,<br>Jiangxi   | JXQN | 96  | 114°22'<br>28.3'' | 24° 38'<br>64.2'' | 352.3 | 120 | Big tree at a farm village                                                   |
| Ruijin, Jiangxi       | JXRJ | 97  | 116°00'<br>83.4'' | 25°57'<br>00.8''  | 220.9 | 43  | Tree near the rural paddy field                                              |
| Ruijin, Jiangxi       | JXRJ | 98  | 116°00'<br>43.7'' | 25°53'<br>23.5''  | 211.8 | 78  | Tree at the scenic area                                                      |
| Ruijin, Jiangxi       | JXRJ | 99  | 116°00'<br>19.8'' | 25°53'<br>06.8''  | 215.3 | 75  | Tree at the scenic area                                                      |
| Ruijin, Jiangxi       | JXRJ | 100 | 116°00'<br>15.9'' | 25°53'<br>07.5''  | 209.3 | 128 | Big tree at a farm village                                                   |
| Ruijin, Jiangxi       | JXRJ | 101 | 115°57'<br>82.0'' | 25°54'<br>45.5''  | 219.9 | 161 | Big tree at a farm village                                                   |
| Suichuan,<br>Jiangxi  | JXSC | 102 | 114°30'<br>08.2'' | 26°18'<br>50.1''  | 110.2 | 118 | Big tree at a farm village                                                   |
| Suichuan,<br>Jiangxi  | JXSC | 103 | 114°30'<br>08.8'' | 26°18'<br>48.2''  | 111.3 | 89  | Tree at a farm village                                                       |
| Suichuan,<br>Jiangxi  | JXSC | 104 | 114°30'<br>07.6'' | 26°18'<br>50.4''  | 112.2 | 115 | Big tree at a farm village                                                   |
| Suichuan,<br>Jiangxi  | JXSC | 105 | 114°30'<br>06.9'' | 26°18'<br>52.7''  | 113.9 | 83  | Tree at a farm village                                                       |
| Taihe, Jiangxi        | JXTH | 106 | 114°58'<br>06.5'' | 26°48'<br>31.5''  | 50.4  | 185 | At the riverside of Jintan Gulin Forest, more than 200 big trees grow        |
| Taihe, Jiangxi        | JXTH | 107 | 114°58'<br>06.3'' | 26°48'<br>33.6''  | 50.9  | 129 | At the riverside of Jintan Gulin Forest, more than 200 big trees grow        |
| Taihe, Jiangxi        | JXTH | 108 | 114°58'<br>06.1'' | 26°48'<br>29.9''  | 49.7  | 153 | At the riverside of Jintan Gulin Forest, more than 200 big trees grow        |

|                   |      |     |               |              |       |     |                                                                                          |
|-------------------|------|-----|---------------|--------------|-------|-----|------------------------------------------------------------------------------------------|
| Wan'an, Jiangxi   | JXWA | 109 | 114°52' 98.5" | 26°33' 58.3" | 102.4 | 86  | Rural secondary forest near farm village; Many camphor grow with the dominance of bamboo |
| Wan'an, Jiangxi   | JXWA | 110 | 114°52' 99.3" | 26°33' 58.1" | 102.2 | 103 | Rural secondary forest near farm village; Many camphor grow with the dominance of bamboo |
| Wan'an, Jiangxi   | JXWA | 111 | 114°52' 98.2" | 26°33' 57.8" | 102.8 | 143 | Rural secondary forest near farm village; Many camphor grow with the dominance of bamboo |
| Wan'an, Jiangxi   | JXWA | 112 | 114°52' 98.1" | 26°33' 58.6" | 102.2 | 94  | Rural secondary forest near farm village; Many camphor grow with the dominance of bamboo |
| Wan'an, Jiangxi   | JXWA | 113 | 114°52' 97.5" | 26°33' 56.3" | 102.3 | 100 | Rural secondary forest near farm village; Many camphor grow with the dominance of bamboo |
| An'fu, Jiangxi    | JXAF | 114 | 114°40' 67.5" | 27°22' 50.3" | 79.4  | 205 | Giant tree at a farm village                                                             |
| An'fu, Jiangxi    | JXAF | 115 | 114°41' 59.5" | 27°22' 19.7" | 77.1  | 191 | Big tree at a riverside farm village                                                     |
| An'fu, Jiangxi    | JXAF | 116 | 114°41' 59.4" | 27°22' 19.6" | 78.2  | 312 | Giant tree at a riverside farm village                                                   |
| An'fu, Jiangxi    | JXAF | 117 | 114°41' 58.2" | 27°23' 01.7" | 87.6  | 206 | Giant tree at a farm village                                                             |
| Xiajiang, Jiangxi | JXXJ | 118 | 115°20' 29.5" | 27°30' 30.8" | 30.5  | 130 | Big tree at a farm village                                                               |
| Xiajiang, Jiangxi | JXXJ | 119 | 115°19' 59.3" | 27°30' 45.5" | 58    | 139 | Big tree at a farm village                                                               |
| Xiajiang, Jiangxi | JXXJ | 120 | 115°40' 39.7" | 27°30' 89.7" | 59.5  | 118 | Big tree at a farm village                                                               |
| Xiajiang, Jiangxi | JXXJ | 121 | 115°33' 09.8" | 27°30' 45.1" | 31.7  | 108 | Big tree at a farm village                                                               |
| Xin'gan, Jiangxi  | JXXG | 122 | 115°27' 48.5" | 27°48' 81.6" | 60.5  | 153 | At the riverside farm village, more than 30 big trees grow                               |
| Xin'gan, Jiangxi  | JXXG | 123 | 115°27' 48.9" | 27°48' 81.2" | 59.8  | 171 | At the riverside farm village, more than 30 big trees grow                               |
| Xin'gan, Jiangxi  | JXXG | 124 | 115°27' 48.7" | 27°48' 80.9" | 62.1  | 105 | At the riverside farm village, more than 30 big trees grow                               |
| Xin'gan, Jiangxi  | JXXG | 125 | 115°28' 63.5" | 27°50' 40.1" | 46.4  | 124 | At the riverside paddy field, more than 50 big trees grow                                |
| Xin'gan, Jiangxi  | JXXG | 126 | 115°28' 64.1" | 27°50' 40.8" | 45.9  | 100 | At the riverside paddy field, more than 50 big trees grow                                |
| Yongfeng, Jiangxi | JXYF | 127 | 115°31' 19.9" | 27°09' 08.8" | 103.8 | 94  | Tree at a farm village                                                                   |
| Yongfeng, Jiangxi | JXYF | 128 | 115°31' 19.1" | 27°09' 08.2" | 101.4 | 74  | Tree at a farm village                                                                   |
| Yongfeng, Jiangxi | JXYF | 129 | 115°31' 19.4" | 27°09' 08.0" | 99.7  | 126 | Big tree at a farm village                                                               |
| Yongfeng, Jiangxi | JXYF | 130 | 115°27' 54.6" | 27°19' 59.7" | 84.1  | 86  | Tree at a farm village                                                                   |
| Yongfeng, Jiangxi | JXYF | 131 | 115°27' 54.1" | 27°19' 59.3" | 78.9  | 165 | Big tree at a farm village                                                               |
| Ji'an, Jiangxi    | JXJA | 132 | 115°08' 71.5" | 27°04' 90.3" | 75.1  | 61  | Tree at a rural riverside                                                                |
| Ji'an, Jiangxi    | JXJA | 133 | 115°08' 72.0" | 27°04' 91.1" | 75.2  | 70  | Tree at a rural riverside                                                                |
| Ji'an, Jiangxi    | JXJA | 134 | 115°08' 73.1" | 27°04' 90.7" | 76.5  | 62  | Tree at a rural riverside                                                                |
| Ji'an, Jiangxi    | JXJA | 135 | 115°08' 74.0" | 27°04' 92.2" | 76.1  | 52  | Tree at a rural riverside                                                                |
| Ji'an, Jiangxi    | JXJA | 136 | 115°08' 74.4" | 27°04' 94.3" | 75.9  | 67  | Tree at a rural riverside                                                                |

| Location            | Code  | ID  | Latitude          | Longitude        | Height (m) | DBH (cm) | Description                                             |
|---------------------|-------|-----|-------------------|------------------|------------|----------|---------------------------------------------------------|
| Jishui, Jiangxi     | JXJS  | 137 | 115°14'<br>83.1'' | 27°26'<br>13.7'' | 45.8       | 100      | Big tree at a riverside rural area                      |
| Jishui, Jiangxi     | JXJS  | 138 | 115°14'<br>82.9'' | 27°26'<br>13.6'' | 45.7       | 131      | Big tree at a riverside rural area                      |
| Jishui, Jiangxi     | JXJS  | 139 | 115°07'<br>72.2'' | 27°15'<br>26.1'' | 41         | 207      | Giant tree at a suburban area                           |
| Jishui, Jiangxi     | JXJS  | 140 | 115°07'78.<br>2'' | 27°13'<br>99.9'' | 55.1       | 53       | Tree at a county government square                      |
| Putian, Fujian      | FJPT  | 141 | 118°34'<br>50.5'' | 25°19'<br>29.9'' | 118.4      | 400      | Giant tree at a farm village                            |
| Putian, Fujian      | FJPT  | 142 | 118°34'<br>46.8'' | 25°19'<br>30.6'' | 128.3      | 150      | Big tree adjacent to a private house at a farm village  |
| Putian, Fujian      | FJPT  | 143 | 118°49'<br>33.8'' | 25°38'<br>02.1'' | 494.3      | 260      | Giant tree at a farm village                            |
| Putian, Fujian      | FJPT  | 144 | 118°56'<br>55.6'' | 25°39'<br>05.3'' | 198.1      | 100      | Big tree at a farm village                              |
| Putian, Fujian      | FJPT  | 145 | 118°56'<br>10.9'' | 25°42'<br>31.3'' | 282.4      | 120      | Big tree at a farm village                              |
| Pucheng, Fujian     | FJPC  | 146 | 118°31'<br>36.1'' | 27°55'<br>34.9'' | 219.1      | 42       | Roadside tree at urban area                             |
| Pucheng, Fujian     | FJPC  | 147 | 118°32'<br>43.8'' | 27°55'<br>24.1'' | 248.5      | 96       | Suburban secondary forest at Xiangloushan Garden        |
| Pucheng, Fujian     | FJPC  | 148 | 118°32'<br>59.8'' | 27°55'<br>18.8'' | 324.4      | 49       | Suburban secondary forest at Xiangloushan Garden        |
| Pucheng, Fujian     | FJPC  | 149 | 118°31'<br>35.7'' | 27°55'<br>99.5'' | 257.4      | 63       | Suburban secondary forest at Xiangloushan Garden        |
| Pucheng, Fujian     | FJPC  | 150 | 118°32'<br>67.2'' | 27°55'<br>24.2'' | 301.4      | 36       | Suburban secondary forest at Xiangloushan Garden        |
| Wuyishan, Fujian    | FJWYS | 151 | 118°01'<br>13.2'' | 27°44'<br>21.7'' | 221.8      | 79       | Tree at Zhangshu Garden                                 |
| Wuyishan, Fujian    | FJWYS | 152 | 118°01'<br>12.3'' | 27°44'<br>23.4'' | 195.2      | 90       | Tree at Zhangshu Garden                                 |
| Wuyishan, Fujian    | FJWYS | 153 | 118°01'<br>12.1'' | 27°44'<br>23.2'' | 195.2      | 89       | Tree at Zhangshu Garden                                 |
| Wuyishan, Fujian    | FJWYS | 154 | 118°01'<br>14.2'' | 27°44'<br>21.1'' | 252.3      | 53       | Roadside tree at urban area                             |
| Chun'an, Zhejiang   | ZJCA  | 155 | 119°02'<br>13.8'' | 29°36'<br>16.2'' | 165.5      | 125      | Roadside tree at urban area                             |
| Chun'an, Zhejiang   | ZJCA  | 156 | 119°02'<br>05.0'' | 29°36'<br>08.4'' | 153.2      | 50       | Roadside tree at urban area                             |
| Chun'an, Zhejiang   | ZJCA  | 157 | 119°02'<br>19.6'' | 29°36'<br>24.3'' | 158.1      | 78       | Roadside tree at urban area                             |
| Chun'an, Zhejiang   | ZJCA  | 158 | 119°02'<br>28.0'' | 29°36'<br>19.2'' | 138.4      | 130      | Roadside tree at urban area                             |
| Qingyuan, Zhejiang  | ZJQY  | 159 | 119°04'<br>48.5'' | 27°36'<br>26.1'' | 409.8      | 101      | Big tree adjacent to a ancestral temple of farm village |
| Qingyuan, Zhejiang  | ZJQY  | 160 | 119°00'<br>07.2'' | 27°36'<br>98.8'' | 318.1      | 102      | Big tree adjacent to a farm village                     |
| Qingyuan, Zhejiang  | ZJQY  | 161 | 119°05'<br>61.3'' | 27°37'<br>44.5'' | 345.2      | 100      | Big tree at a farm village                              |
| Qingyuan, Zhejiang  | ZJQY  | 162 | 119°05'<br>60.7'' | 27°37'<br>44.1'' | 345.2      | 156      | Big tree at a farm village                              |
| Xiangshan, Zhejiang | ZJXS  | 163 | 121°52'<br>07.4'' | 29°28'<br>63.6'' | 24.7       | 45       | Tree at a garden                                        |
| Xiangshan, Zhejiang | ZJXS  | 164 | 121°52'<br>38.6'' | 29°22'<br>78.7'' | 19.4       | 500      | Roadside tree at a temple                               |

|                        |      |     |                  |                 |      |     |                             |
|------------------------|------|-----|------------------|-----------------|------|-----|-----------------------------|
| Xiangshan,<br>Zhejiang | ZJXS | 165 | 121°52'<br>38.9" | 29°22'<br>82.3" | 21.5 | 70  | Roadside tree at urban area |
| Xiangshan,<br>Zhejiang | ZJXS | 166 | 121°52'<br>43.5" | 29°22'<br>80.8" | 21.8 | 70  | Tree at a farm village      |
| Xiangshan,<br>Zhejiang | ZJXS | 167 | 121°52'<br>55.2" | 29°22'<br>93.4" | 10.4 | 110 | Big tree at a farm village  |
| Osaka,Japan            | JP   | 168 | 133°74'<br>24.6" | 33°48'<br>75.9" | 53.7 | 75  | Roadside tree at a garden   |
| Osaka,Japan            | JP   | 169 | 133°42'<br>37.2" | 34°49'<br>33.4" | 44.9 | 94  | Roadside tree at a garden   |
| Osaka,Japan            | JP   | 170 | 133°62'<br>57.9" | 34°79'<br>83.3" | 87.6 | 87  | Roadside tree at a garden   |
| Osaka,Japan            | JP   | 171 | 133°67'<br>55.9" | 34°37'<br>53.2" | 45.3 | 93  | Roadside tree at a garden   |

Table S2. Sequencing quality of the 171 sampled *C. camphora* individuals.

| Site Name             | Genet<br>IDs | Raw ba-<br>ses(bp) | Clean ba-<br>ses(bp) | Q20(<br>%) | Q30(<br>%) | GC con-<br>tent(%) | Clean<br>reads | Mapping<br>reads | Mapping<br>rate(%) | Coverage<br>1× | Coverage<br>4× |
|-----------------------|--------------|--------------------|----------------------|------------|------------|--------------------|----------------|------------------|--------------------|----------------|----------------|
| Luzhou, Sichuan       | 1            | 757089504          | 757027296            | 95.57      | 89.59      | 38.48              | 5257134        | 5080506          | 96.64              | 10.87          | 5.1            |
| Luzhou, Sichuan       | 2            | 711365472          | 711310176            | 95.4       | 89.18      | 38.45              | 4939654        | 4776549          | 96.7               | 10.92          | 4.99           |
| Luzhou, Sichuan       | 3            | 747753408          | 747700416            | 95.37      | 89.16      | 38.38              | 5192364        | 5017944          | 96.64              | 11.36          | 5.19           |
| Luzhou, Sichuan       | 4            | 719344800          | 719286912            | 94.68      | 87.48      | 38.33              | 4995048        | 4827928          | 96.65              | 10.04          | 4.85           |
| Luzhou, Sichuan       | 5            | 672134688          | 672089472            | 94.3       | 86.66      | 38.36              | 4667288        | 4509285          | 96.61              | 10.66          | 4.93           |
| Yibing, Sichuan       | 6            | 793846080          | 793816704            | 97.1       | 92.65      | 38.95              | 5512616        | 5312152          | 96.36              | 12.65          | 5.98           |
| Yibing, Sichuan       | 7            | 832949568          | 832917888            | 96.81      | 91.86      | 39.06              | 5784152        | 5430384          | 93.88              | 12.36          | 6.02           |
| Yibing, Sichuan       | 8            | 706752864          | 706706496            | 94.91      | 88.04      | 38.36              | 4907684        | 4736260          | 96.51              | 10.69          | 4.92           |
| Yibing, Sichuan       | 9            | 785517120          | 785460960            | 95.42      | 89.18      | 38.36              | 5454590        | 5266858          | 96.56              | 10.71          | 5.14           |
| Yibing, Sichuan       | 10           | 768889152          | 768834720            | 94.87      | 87.82      | 38.21              | 5339130        | 5159263          | 96.63              | 10.92          | 5.11           |
| Dazu, Chong-<br>qing  | 11           | 917251488          | 917158464            | 94.39      | 87.36      | 37.66              | 6369156        | 6131947          | 96.28              | 11.19          | 5.23           |
| Dazu, Chong-<br>qing  | 12           | 854168256          | 854064864            | 94.81      | 88.16      | 38.36              | 5931006        | 5724865          | 96.52              | 13.78          | 6.16           |
| Dazu, Chong-<br>qing  | 13           | 690401088          | 690323616            | 94.57      | 87.66      | 38.26              | 4793914        | 4609100          | 96.14              | 13.02          | 5.6            |
| Dazu, Chong-<br>qing  | 14           | 543957984          | 543901248            | 96.28      | 90.56      | 38.52              | 3777092        | 3658907          | 96.87              | 10.75          | 4.93           |
| Youyang,<br>Chongqing | 15           | 1049364864         | 1049327136           | 96.64      | 91.36      | 38.56              | 7286994        | 7069826          | 97.02              | 13.8           | 7.13           |
| Youyang,<br>Chongqing | 16           | 705722400          | 705665952            | 95.62      | 89.59      | 38.64              | 4900458        | 4740649          | 96.74              | 12.53          | 5.64           |
| Youyang,<br>Chongqing | 17           | 942522336          | 942488928            | 96.87      | 91.98      | 38.45              | 6545062        | 6350401          | 97.03              | 13.21          | 6.72           |
| Daozhen, Gui-<br>zhou | 18           | 670384512          | 670361472            | 96.54      | 91.07      | 38.44              | 4655288        | 4524082          | 97.18              | 10.06          | 5.06           |
| Daozhen, Gui-<br>zhou | 19           | 771966720          | 771906528            | 95.25      | 88.83      | 37.96              | 5360462        | 5143146          | 95.95              | 9.48           | 4.85           |
| Daozhen, Gui-<br>zhou | 20           | 695571840          | 695553408            | 96.62      | 91.23      | 38.58              | 4830232        | 4605010          | 95.34              | 12.63          | 5.68           |
| Tongren, Gui-<br>zhou | 21           | 672359616          | 672357888            | 94.41      | 86.55      | 38.88              | 4669152        | 4512789          | 96.65              | 9.39           | 4.87           |
| Tongren, Gui-<br>zhou | 22           | 771611328          | 771543072            | 95.47      | 89.47      | 38.52              | 5357938        | 5190638          | 96.88              | 11.4           | 5.52           |

|                   |    |            |            |       |       |       |          |          |       |       |      |
|-------------------|----|------------|------------|-------|-------|-------|----------|----------|-------|-------|------|
| Tongren, Gui-zhou | 23 | 717448032  | 717425568  | 96.94 | 92.15 | 38.76 | 4982122  | 4840170  | 97.15 | 13.22 | 6.15 |
| Tongren, Gui-zhou | 24 | 1017777888 | 1017743616 | 96.89 | 92    | 38.94 | 7067664  | 6867400  | 97.17 | 13.04 | 6.67 |
| Yichang, Hubei    | 25 | 708688512  | 708611040  | 94.78 | 88.16 | 38.52 | 4920910  | 4748375  | 96.49 | 11.89 | 5.37 |
| Yichang, Hubei    | 26 | 773208288  | 773206560  | 95.94 | 89.89 | 38.63 | 5369490  | 5163565  | 96.16 | 9.34  | 4.98 |
| Yichang, Hubei    | 27 | 1234387296 | 1234269216 | 96.78 | 91.63 | 38.81 | 8571314  | 8305891  | 96.9  | 13.91 | 7.18 |
| Yichang, Hubei    | 28 | 791316288  | 791234496  | 94.77 | 88.19 | 38.36 | 5494684  | 5277126  | 96.04 | 11.79 | 5.5  |
| Yichang, Hubei    | 29 | 724834656  | 724762944  | 94.16 | 86.67 | 38.25 | 5033076  | 4852517  | 96.41 | 10.89 | 5.01 |
| Huaihua, Hunan    | 30 | 794490336  | 794459520  | 96.41 | 90.74 | 38.7  | 5517080  | 5353900  | 97.04 | 15.42 | 7.12 |
| Huaihua, Hunan    | 31 | 710625600  | 710579232  | 94.84 | 87.83 | 38.13 | 4934578  | 4774786  | 96.76 | 10.44 | 5.2  |
| Huaihua, Hunan    | 32 | 674470656  | 674433792  | 93.72 | 85    | 38.31 | 4683568  | 4549060  | 97.13 | 10.64 | 5.25 |
| Huaihua, Hunan    | 33 | 954293184  | 954263232  | 96.51 | 91.04 | 38.59 | 6626828  | 6428904  | 97.01 | 11.64 | 6.26 |
| Huaihua, Hunan    | 34 | 772575840  | 772519104  | 95.33 | 89.03 | 38.33 | 5364716  | 5178582  | 96.53 | 10.49 | 5.24 |
| Shuangfeng, Hunan | 35 | 1055292480 | 1055158848 | 97.08 | 92.56 | 38.88 | 7327492  | 7092947  | 96.8  | 13.56 | 6.66 |
| Shuangfeng, Hunan | 36 | 838555200  | 838473120  | 96.32 | 90.55 | 38.69 | 5822730  | 5638588  | 96.84 | 11.86 | 6.07 |
| Shuangfeng, Hunan | 37 | 802420992  | 802360800  | 95.35 | 89.03 | 38.33 | 5571950  | 5390088  | 96.74 | 10.51 | 5.37 |
| Shuangfeng, Hunan | 38 | 752745312  | 752688864  | 95.29 | 88.9  | 38.36 | 5227006  | 5053147  | 96.67 | 10.45 | 5.04 |
| Shuangfeng, Hunan | 39 | 843558336  | 843467904  | 96.82 | 91.84 | 38.56 | 5857416  | 5655215  | 96.55 | 14.54 | 6.92 |
| Chibi, Hubei      | 40 | 414556992  | 414509760  | 96.92 | 92.23 | 38.53 | 2878540  | 2784923  | 96.75 | 9.12  | 4.12 |
| Chibi, Hubei      | 41 | 737811072  | 737745696  | 94.39 | 87.05 | 38.48 | 5123234  | 4935498  | 96.34 | 11.26 | 5.12 |
| Chibi, Hubei      | 42 | 746830368  | 746744256  | 94.92 | 88.6  | 38.33 | 5185724  | 4995037  | 96.32 | 11.57 | 5.29 |
| Chibi, Hubei      | 43 | 705388320  | 705301344  | 94.96 | 88.59 | 38.09 | 4897926  | 4718855  | 96.34 | 11.56 | 5.25 |
| Hong'an, Hubei    | 44 | 654514848  | 654454080  | 93.72 | 85.72 | 38.52 | 4544820  | 4375543  | 96.28 | 10.59 | 4.79 |
| Hong'an, Hubei    | 45 | 705703968  | 705619296  | 97    | 92.31 | 38.7  | 4900134  | 4734912  | 96.63 | 12.55 | 5.87 |
| Hong'an, Hubei    | 46 | 789645312  | 789560064  | 94.37 | 87.16 | 38.43 | 5483056  | 5271303  | 96.14 | 11.32 | 5.32 |
| Hong'an, Hubei    | 47 | 850181472  | 850070304  | 96.97 | 92.32 | 38.78 | 5903266  | 5698288  | 96.53 | 12.77 | 5.93 |
| Hong'an, Hubei    | 48 | 873982656  | 873888192  | 94.9  | 88.34 | 38.42 | 6068668  | 5841216  | 96.25 | 11.94 | 5.57 |
| An'qing, Anhui    | 49 | 699289344  | 699207840  | 94.75 | 88.07 | 38.25 | 4855610  | 4679025  | 96.36 | 10.24 | 4.91 |
| An'qing, Anhui    | 50 | 1000135008 | 1000011456 | 97.19 | 92.9  | 38.75 | 6944524  | 6706787  | 96.58 | 15.6  | 7.41 |
| An'qing, Anhui    | 51 | 713926656  | 713840544  | 94.69 | 87.91 | 38.31 | 4957226  | 4776183  | 96.35 | 10.42 | 4.89 |
| An'qing, Anhui    | 52 | 750256128  | 750167712  | 95    | 88.72 | 38.16 | 5209498  | 5020759  | 96.38 | 12.26 | 5.54 |
| An'qing, Anhui    | 53 | 698383584  | 698302944  | 94.97 | 88.51 | 38.48 | 4849326  | 4661670  | 96.13 | 11.29 | 5.13 |
| Chenzhou, Hunan   | 54 | 1480446720 | 1480278816 | 97.07 | 92.47 | 38.75 | 10279714 | 9984393  | 97.13 | 13.76 | 7.23 |
| Chenzhou, Hunan   | 55 | 1948032576 | 1948032576 | 94.13 | 86.74 | 38.11 | 13528004 | 12852817 | 95.01 | 13.86 | 6.89 |
| Chenzhou, Hunan   | 56 | 655654464  | 655602624  | 95.57 | 89.63 | 38.32 | 4552796  | 4402749  | 96.7  | 10.12 | 4.74 |
| Chenzhou, Hunan   | 57 | 841538304  | 841505760  | 96.89 | 91.98 | 38.61 | 5843790  | 5649646  | 96.68 | 13.9  | 6.63 |
| Changsha, Hunan   | 58 | 689112288  | 689061312  | 94.79 | 87.73 | 38.36 | 4785148  | 4620260  | 96.55 | 11.51 | 5.18 |
| Changsha, Hunan   | 59 | 1038871872 | 1038741696 | 97.05 | 92.6  | 38.92 | 7213484  | 6968119  | 96.6  | 13.74 | 6.57 |
| Changsha, Hunan   | 60 | 767782368  | 767729952  | 94.82 | 87.85 | 38.24 | 5331458  | 5150908  | 96.61 | 11.3  | 5.19 |
| Changsha, Hunan   | 61 | 712079424  | 712029024  | 95.18 | 88.62 | 38.38 | 4944646  | 4783796  | 96.75 | 9.99  | 4.84 |



|                    |     |            |            |       |       |       |         |         |       |       |      |
|--------------------|-----|------------|------------|-------|-------|-------|---------|---------|-------|-------|------|
| Changsha, Hunan    | 62  | 747473760  | 747415008  | 95.83 | 90.12 | 38.16 | 5190382 | 5007346 | 96.47 | 15.08 | 6.74 |
| Yongxiu, Jiangxi   | 63  | 745216416  | 745202592  | 95.25 | 88.59 | 38.09 | 5175018 | 4999495 | 96.61 | 12.82 | 5.76 |
| Yongxiu, Jiangxi   | 64  | 765917568  | 765903456  | 94    | 85.71 | 38.08 | 5318774 | 5116015 | 96.19 | 14.46 | 6.15 |
| Yongxiu, Jiangxi   | 65  | 699683040  | 699666912  | 93.73 | 85    | 38.15 | 4858798 | 4684742 | 96.42 | 12.82 | 5.3  |
| An'yi, Jiangxi     | 66  | 846302976  | 846287424  | 94.41 | 86.77 | 37.28 | 5876996 | 5667973 | 96.44 | 12.58 | 5.61 |
| An'yi, Jiangxi     | 67  | 973454112  | 973437696  | 95.19 | 88.55 | 37.75 | 6759984 | 6523427 | 96.5  | 15.86 | 6.48 |
| An'yi, Jiangxi     | 68  | 872852544  | 872836128  | 94.8  | 87.62 | 37.52 | 6061362 | 5840224 | 96.35 | 14.89 | 5.99 |
| An'yi, Jiangxi     | 69  | 926095392  | 926081856  | 94.67 | 87.37 | 37.56 | 6431124 | 6209108 | 96.55 | 15.25 | 6.07 |
| Hukou, Jiangxi     | 70  | 988583904  | 988580448  | 95.39 | 88.63 | 38.17 | 6865142 | 6575817 | 95.79 | 9.42  | 5.17 |
| Hukou, Jiangxi     | 71  | 890290656  | 890199648  | 94.26 | 86.59 | 37.42 | 6181942 | 5965908 | 96.51 | 15.28 | 5.94 |
| Hukou, Jiangxi     | 72  | 735123456  | 735120864  | 95.25 | 88.43 | 37.78 | 5105006 | 4915841 | 96.29 | 8.2   | 4.55 |
| Hukou, Jiangxi     | 73  | 810257472  | 810254880  | 95.11 | 88.04 | 38.9  | 5626770 | 5416485 | 96.26 | 10.14 | 5.27 |
| Wuyuan, Jiangxi    | 74  | 786117888  | 786038400  | 94.12 | 86.2  | 37.83 | 5458600 | 5244911 | 96.09 | 12.92 | 5.57 |
| Wuyuan, Jiangxi    | 75  | 712337760  | 712274976  | 93.77 | 85    | 37.94 | 4946354 | 4782935 | 96.7  | 12.43 | 5.57 |
| Wuyuan, Jiangxi    | 76  | 850843008  | 850751712  | 94.3  | 86.83 | 38.03 | 5907998 | 5685576 | 96.24 | 12.82 | 5.79 |
| Wuyuan, Jiangxi    | 77  | 931396032  | 931393152  | 95.11 | 88.06 | 38.72 | 6468008 | 6051715 | 93.56 | 9.72  | 5.32 |
| Ruichang, Jiangxi  | 78  | 637800768  | 637740576  | 93.67 | 85    | 38.02 | 4428754 | 4271421 | 96.45 | 14.83 | 5.76 |
| Ruichang, Jiangxi  | 79  | 889807392  | 889717536  | 93.58 | 85.09 | 37.54 | 6178594 | 5954515 | 96.37 | 14.86 | 5.96 |
| Ruichang, Jiangxi  | 80  | 902180736  | 902080224  | 94.34 | 86.88 | 37.62 | 6264446 | 6029877 | 96.26 | 16.01 | 6.5  |
| Pingxiang, Jiangxi | 81  | 815833728  | 815741280  | 94.03 | 86.03 | 37.99 | 5664870 | 5468433 | 96.53 | 13.23 | 5.94 |
| Pingxiang, Jiangxi | 82  | 592092864  | 592037568  | 93.65 | 85    | 36.62 | 4111372 | 3972964 | 96.63 | 9.95  | 4.34 |
| Pingxiang, Jiangxi | 83  | 760116384  | 760050144  | 93.75 | 85    | 37.56 | 5278126 | 5103690 | 96.7  | 12.15 | 5.44 |
| Pingxiang, Jiangxi | 84  | 715152960  | 715087584  | 93.78 | 85    | 37.93 | 4965886 | 4801592 | 96.69 | 13.43 | 5.67 |
| Le'an, Jiangxi     | 85  | 753049152  | 753049152  | 93.55 | 85    | 37.5  | 5229508 | 5041914 | 96.41 | 8.75  | 4.72 |
| Le'an, Jiangxi     | 86  | 968915232  | 968795712  | 96.92 | 92.1  | 38.89 | 6727748 | 6500888 | 96.63 | 11.41 | 5.78 |
| Le'an, Jiangxi     | 87  | 1145344608 | 1145344608 | 93.34 | 85    | 37.7  | 7953782 | 7635477 | 96    | 12.1  | 5.77 |
| Le'an, Jiangxi     | 88  | 578274048  | 578274048  | 93.7  | 85.94 | 37.55 | 4015792 | 3623072 | 90.22 | 8.23  | 4.36 |
| Le'an, Jiangxi     | 89  | 713645856  | 713643552  | 96.11 | 90.32 | 38.7  | 4955858 | 4783251 | 96.52 | 9.72  | 5.02 |
| Zixi, Jiangxi      | 90  | 770412096  | 770397696  | 94.03 | 85.78 | 37.92 | 5349984 | 5154890 | 96.35 | 12.93 | 5.75 |
| Zixi, Jiangxi      | 91  | 563195232  | 563194368  | 95.54 | 88.97 | 39.25 | 3911072 | 3741808 | 95.67 | 9.43  | 4.42 |
| Zixi, Jiangxi      | 92  | 842536800  | 842533920  | 96.15 | 90.4  | 38.62 | 5850930 | 5602547 | 95.75 | 12.83 | 6.18 |
| Zixi, Jiangxi      | 93  | 743383008  | 743368032  | 94.28 | 86.34 | 38.16 | 5162278 | 4956042 | 96    | 12.68 | 5.26 |
| Quannan, Jiangxi   | 94  | 839046816  | 838960416  | 94.05 | 86.03 | 37.72 | 5826114 | 5617332 | 96.42 | 12.79 | 5.77 |
| Quannan, Jiangxi   | 95  | 732485376  | 732417696  | 93.66 | 85.15 | 38.05 | 5086234 | 4897779 | 96.29 | 11.99 | 5.25 |
| Quannan, Jiangxi   | 96  | 809485056  | 809407296  | 93.95 | 85.88 | 37.49 | 5620884 | 5415081 | 96.34 | 12.43 | 5.38 |
| Ruijin, Jiangxi    | 97  | 757196352  | 757196352  | 93.38 | 85    | 37.57 | 5258308 | 5054919 | 96.13 | 9.9   | 5.01 |
| Ruijin, Jiangxi    | 98  | 924037056  | 923926752  | 97.05 | 92.41 | 38.72 | 6416158 | 6210550 | 96.8  | 13.06 | 6.44 |
| Ruijin, Jiangxi    | 99  | 702111168  | 702021888  | 96.8  | 91.8  | 38.81 | 4875152 | 4712306 | 96.66 | 9.95  | 5.14 |
| Ruijin, Jiangxi    | 100 | 714321216  | 714248640  | 93.91 | 85    | 37.39 | 4960060 | 4801377 | 96.8  | 14.12 | 5.43 |
| Ruijin, Jiangxi    | 101 | 784202112  | 784120320  | 93.69 | 85    | 37.66 | 5445280 | 5272982 | 96.84 | 11.13 | 5.41 |
| Suichuan, Jiangxi  | 102 | 799976736  | 799901856  | 94.42 | 87.19 | 38.23 | 5554874 | 5341539 | 96.16 | 11.39 | 5.21 |
| Suichuan, Jiangxi  | 103 | 769604256  | 769528224  | 94.31 | 86.97 | 38.52 | 5343946 | 5147264 | 96.32 | 12.04 | 5.47 |

|                   |     |            |            |       |       |       |         |         |       |       |      |
|-------------------|-----|------------|------------|-------|-------|-------|---------|---------|-------|-------|------|
| Suichuan, Jiangxi | 104 | 781036992  | 780958080  | 94.25 | 86.94 | 38.52 | 5423320 | 5207998 | 96.03 | 11.45 | 5.18 |
| Suichuan, Jiangxi | 105 | 609175296  | 609108768  | 94.63 | 87.75 | 38.47 | 4229922 | 4074912 | 96.34 | 11.26 | 4.92 |
| Taihe, Jiangxi    | 106 | 899409888  | 899391744  | 95.09 | 88.37 | 37.78 | 6245776 | 6021391 | 96.41 | 13.34 | 5.83 |
| Taihe, Jiangxi    | 107 | 820418976  | 820416672  | 95.79 | 89.55 | 38.75 | 5697338 | 5462031 | 95.87 | 11.26 | 5.59 |
| Taihe, Jiangxi    | 108 | 789003360  | 788990976  | 94.98 | 88.05 | 37.8  | 5479104 | 5283575 | 96.43 | 13.16 | 5.77 |
| Wan'an, Jiangxi   | 109 | 741694464  | 741680928  | 93.78 | 85    | 37.23 | 5150562 | 4978635 | 96.66 | 15.24 | 5.45 |
| Wan'an, Jiangxi   | 110 | 678635712  | 678625920  | 94.02 | 85.85 | 37.7  | 4712680 | 4536265 | 96.26 | 10.82 | 5.19 |
| Wan'an, Jiangxi   | 111 | 865950336  | 865936224  | 95    | 87.97 | 37.78 | 6013446 | 5808409 | 96.59 | 14.91 | 6.03 |
| Wan'an, Jiangxi   | 112 | 762613920  | 762611328  | 95.67 | 89.34 | 38.7  | 5295912 | 5093128 | 96.17 | 11.05 | 5.4  |
| Wan'an, Jiangxi   | 113 | 899040384  | 899025984  | 94.14 | 85.91 | 38.07 | 6243236 | 6026403 | 96.53 | 14.55 | 6.33 |
| An'fu, Jiangxi    | 114 | 901757088  | 901753632  | 95.73 | 89.48 | 38.61 | 6262178 | 6039321 | 96.44 | 9.76  | 5.43 |
| An'fu, Jiangxi    | 115 | 1228771872 | 1228771872 | 94.03 | 86.65 | 37.68 | 8533138 | 7632656 | 89.45 | 11.11 | 5.67 |
| An'fu, Jiangxi    | 116 | 1326024576 | 1326024576 | 94.06 | 86.59 | 37.83 | 9208504 | 8864558 | 96.26 | 11.58 | 6.06 |
| An'fu, Jiangxi    | 117 | 798446880  | 798443712  | 94.92 | 87.66 | 38.7  | 5544748 | 5321008 | 95.96 | 9.85  | 5.17 |
| Xiajiang, Jiangxi | 118 | 478140768  | 478132128  | 94.17 | 85    | 38.06 | 3320362 | 3222266 | 97.05 | 10.74 | 4.49 |
| Xiajiang, Jiangxi | 119 | 747969984  | 747957600  | 94.84 | 87.75 | 37.87 | 5194150 | 5008022 | 96.42 | 12.11 | 5.57 |
| Xiajiang, Jiangxi | 120 | 611570592  | 611568576  | 96.19 | 90.43 | 38.67 | 4247004 | 4094432 | 96.41 | 9.05  | 4.46 |
| Xiajiang, Jiangxi | 121 | 457099488  | 457090560  | 94.55 | 87.1  | 37.73 | 3174240 | 3051603 | 96.14 | 10.3  | 4.42 |
| Xin'gan, Jiangxi  | 122 | 840493440  | 840386304  | 95.2  | 89.09 | 38.13 | 5836016 | 5624876 | 96.38 | 13.42 | 5.97 |
| Xin'gan, Jiangxi  | 123 | 765546912  | 765467712  | 94.6  | 87.76 | 38.42 | 5315748 | 5115219 | 96.23 | 11.49 | 5.15 |
| Xin'gan, Jiangxi  | 124 | 755734464  | 755640576  | 94.94 | 88.45 | 38.33 | 5247504 | 5055392 | 96.34 | 12.46 | 5.65 |
| Xin'gan, Jiangxi  | 125 | 747827712  | 747744480  | 94.86 | 88.29 | 38.33 | 5192670 | 5000892 | 96.31 | 12.05 | 5.46 |
| Xin'gan, Jiangxi  | 126 | 804546720  | 804465504  | 94.7  | 87.82 | 37.59 | 5586566 | 5390450 | 96.49 | 11.47 | 5.31 |
| Yongfeng, Jiangxi | 127 | 833988384  | 833902560  | 93.91 | 85.84 | 37.52 | 5790990 | 5581259 | 96.38 | 13.64 | 5.58 |
| Yongfeng, Jiangxi | 128 | 1316621376 | 1316621376 | 93.42 | 85    | 37.73 | 9143204 | 8795661 | 96.2  | 10.77 | 5.98 |
| Yongfeng, Jiangxi | 129 | 908173152  | 908074368  | 93.82 | 85.64 | 37.59 | 6306072 | 6093912 | 96.64 | 13.06 | 5.69 |
| Yongfeng, Jiangxi | 130 | 916406784  | 916297344  | 94.3  | 86.83 | 37.75 | 6363176 | 6132949 | 96.38 | 14.54 | 6.08 |
| Yongfeng, Jiangxi | 131 | 839722752  | 839635488  | 94.19 | 86.46 | 37.77 | 5830802 | 5618914 | 96.37 | 15.3  | 5.96 |
| Ji'an, Jiangxi    | 132 | 748131264  | 748054080  | 93.88 | 85.62 | 37.9  | 5194820 | 5018950 | 96.61 | 13.1  | 5.6  |
| Ji'an, Jiangxi    | 133 | 768765600  | 768688992  | 93.85 | 85    | 37.89 | 5338118 | 5159124 | 96.65 | 14.85 | 6.33 |
| Ji'an, Jiangxi    | 134 | 855763200  | 855670176  | 94.47 | 87.12 | 37.72 | 5942154 | 5727672 | 96.39 | 15.05 | 6.28 |
| Ji'an, Jiangxi    | 135 | 799601184  | 799524864  | 93.65 | 85.3  | 37.67 | 5552256 | 5343929 | 96.25 | 15.33 | 5.9  |
| Ji'an, Jiangxi    | 136 | 744468480  | 744389856  | 94.12 | 86.27 | 37.78 | 5169374 | 4978559 | 96.31 | 14.81 | 6.18 |
| Jishui, Jiangxi   | 137 | 621803520  | 621802656  | 96.09 | 90.26 | 38.93 | 4318074 | 4074987 | 94.37 | 10.53 | 4.95 |
| Jishui, Jiangxi   | 138 | 668286720  | 668284704  | 95.68 | 89.34 | 38.22 | 4640866 | 4480725 | 96.55 | 10.24 | 5.18 |
| Jishui, Jiangxi   | 139 | 668213280  | 668211840  | 95.9  | 89.79 | 38.86 | 4640360 | 4468148 | 96.29 | 10.96 | 5.02 |
| Jishui, Jiangxi   | 140 | 787198464  | 787196736  | 95.88 | 89.73 | 39.08 | 5466644 | 5260779 | 96.23 | 10.02 | 4.97 |
| Putian, Fujian    | 141 | 623426400  | 623369088  | 93.73 | 85.75 | 38.31 | 4328952 | 4165041 | 96.21 | 10.99 | 4.74 |
| Putian, Fujian    | 142 | 808113024  | 808023744  | 94.73 | 87.99 | 38.05 | 5611276 | 5407554 | 96.37 | 10.24 | 5.05 |
| Putian, Fujian    | 143 | 687200544  | 687137184  | 94.3  | 86.95 | 38.43 | 4771786 | 4585587 | 96.1  | 9.6   | 4.63 |
| Putian, Fujian    | 144 | 666500832  | 666453888  | 93.73 | 85    | 38.07 | 4628152 | 4486487 | 96.94 | 9.55  | 4.66 |
| Putian, Fujian    | 145 | 592768512  | 592704288  | 94.84 | 88.31 | 37.99 | 4116002 | 3954440 | 96.07 | 11.88 | 5.01 |
| Pucheng, Fujian   | 146 | 916491168  | 916400160  | 96.71 | 91.46 | 38.86 | 6363890 | 6162160 | 96.83 | 12.82 | 6.28 |
| Pucheng, Fujian   | 147 | 811873440  | 811774656  | 94.58 | 87.79 | 37.67 | 5637324 | 5426623 | 96.26 | 9.65  | 5.07 |

|                     |     |            |            |       |       |       |          |         |       |       |      |
|---------------------|-----|------------|------------|-------|-------|-------|----------|---------|-------|-------|------|
| Pucheng, Fujian     | 148 | 835433280  | 835371072  | 94.98 | 88.31 | 37.54 | 5801188  | 5599650 | 96.53 | 10.47 | 5.01 |
| Pucheng, Fujian     | 149 | 927803520  | 927729216  | 95.34 | 89    | 38.11 | 6442564  | 6219649 | 96.54 | 10.53 | 5.4  |
| Pucheng, Fujian     | 150 | 619644960  | 619602912  | 95.62 | 89.54 | 38.01 | 4302798  | 4129526 | 95.97 | 15.57 | 6.96 |
| Wuyishan, Fujian    | 151 | 689843520  | 689770656  | 96.56 | 91.23 | 38.56 | 4790074  | 4626163 | 96.58 | 8.72  | 4.85 |
| Wuyishan, Fujian    | 152 | 848859264  | 848797632  | 95.46 | 89.25 | 38.45 | 5894428  | 5693264 | 96.59 | 9.87  | 4.88 |
| Wuyishan, Fujian    | 153 | 873702432  | 873634176  | 95.53 | 89.46 | 38.17 | 6066904  | 5860316 | 96.59 | 10.42 | 5.17 |
| Wuyishan, Fujian    | 154 | 978413184  | 978294816  | 96.92 | 92.06 | 39.13 | 6793714  | 6543996 | 96.32 | 12.58 | 6.14 |
| Chun'an, Zhejiang   | 155 | 787988736  | 787925088  | 95.76 | 89.98 | 38.52 | 5471702  | 5272710 | 96.36 | 10.51 | 5.09 |
| Chun'an, Zhejiang   | 156 | 741021120  | 740954016  | 95.14 | 88.64 | 38.7  | 5145514  | 4949910 | 96.2  | 9.98  | 4.68 |
| Chun'an, Zhejiang   | 157 | 1741275072 | 1741275072 | 93.9  | 86.45 | 37.75 | 12092188 | 8887578 | 73.5  | 11.44 | 5.98 |
| Chun'an, Zhejiang   | 158 | 856549152  | 856480032  | 95.5  | 89.32 | 38.63 | 5947778  | 5737092 | 96.46 | 11.02 | 5.31 |
| Qingyuan, Zhejiang  | 159 | 1093144896 | 1093013280 | 96.91 | 92.16 | 38.83 | 7590370  | 7334505 | 96.63 | 11.94 | 6.22 |
| Qingyuan, Zhejiang  | 160 | 782881344  | 782827488  | 95.47 | 89.23 | 39.14 | 5436302  | 5221105 | 96.04 | 10.81 | 5    |
| Qingyuan, Zhejiang  | 161 | 962367264  | 962294400  | 95.14 | 88.49 | 37.91 | 6682600  | 6452436 | 96.56 | 10.74 | 5.24 |
| Qingyuan, Zhejiang  | 162 | 790322112  | 790271136  | 94.85 | 87.9  | 38.03 | 5487994  | 5279700 | 96.2  | 10.1  | 4.77 |
| Xiangshan, Zhejiang | 163 | 706438368  | 706436064  | 95.59 | 89.16 | 38.89 | 4905806  | 4724141 | 96.3  | 9.97  | 4.94 |
| Xiangshan, Zhejiang | 164 | 750787776  | 750700512  | 94.93 | 88.4  | 37.94 | 5213198  | 5023755 | 96.37 | 11.33 | 5.11 |
| Xiangshan, Zhejiang | 165 | 725476032  | 725399712  | 94.96 | 88.52 | 38.14 | 5037498  | 4852700 | 96.33 | 10.81 | 5.04 |
| Xiangshan, Zhejiang | 166 | 712143648  | 712078272  | 94.73 | 87.98 | 38.41 | 4944988  | 4761425 | 96.29 | 12.25 | 5.44 |
| Xiangshan, Zhejiang | 167 | 704127744  | 704054304  | 93.94 | 86.19 | 38.76 | 4889266  | 4698673 | 96.1  | 11.6  | 5.15 |
| Osaka, Japan        | 168 | 827506944  | 827504064  | 95.28 | 88.53 | 37.84 | 5746556  | 5530299 | 96.24 | 9.97  | 4.85 |
| Osaka, Japan        | 169 | 754629408  | 754626816  | 95.62 | 89.13 | 38.61 | 5240464  | 5061287 | 96.58 | 8.49  | 4.63 |
| Osaka, Japan        | 170 | 866410272  | 866406816  | 95.59 | 89.16 | 38.47 | 6016714  | 5788565 | 96.21 | 10.62 | 5.33 |
| Osaka, Japan        | 171 | 841005504  | 841003776  | 95.27 | 88.42 | 38.77 | 5840304  | 5597080 | 95.84 | 9.61  | 5.09 |
